# Supplementary material for: Use of a web-based educational intervention to improve knowledge of healthy diet and lifestyle in women with Gestational Diabetes Mellitus compared to standard clinic-based education
Source: PubMed Central journal article supplement (PMC4974775; doi:10.1186/s12884-016-0996-7), 2016-08-05

**Additional file 2** Flow chart of recruitment procedure.

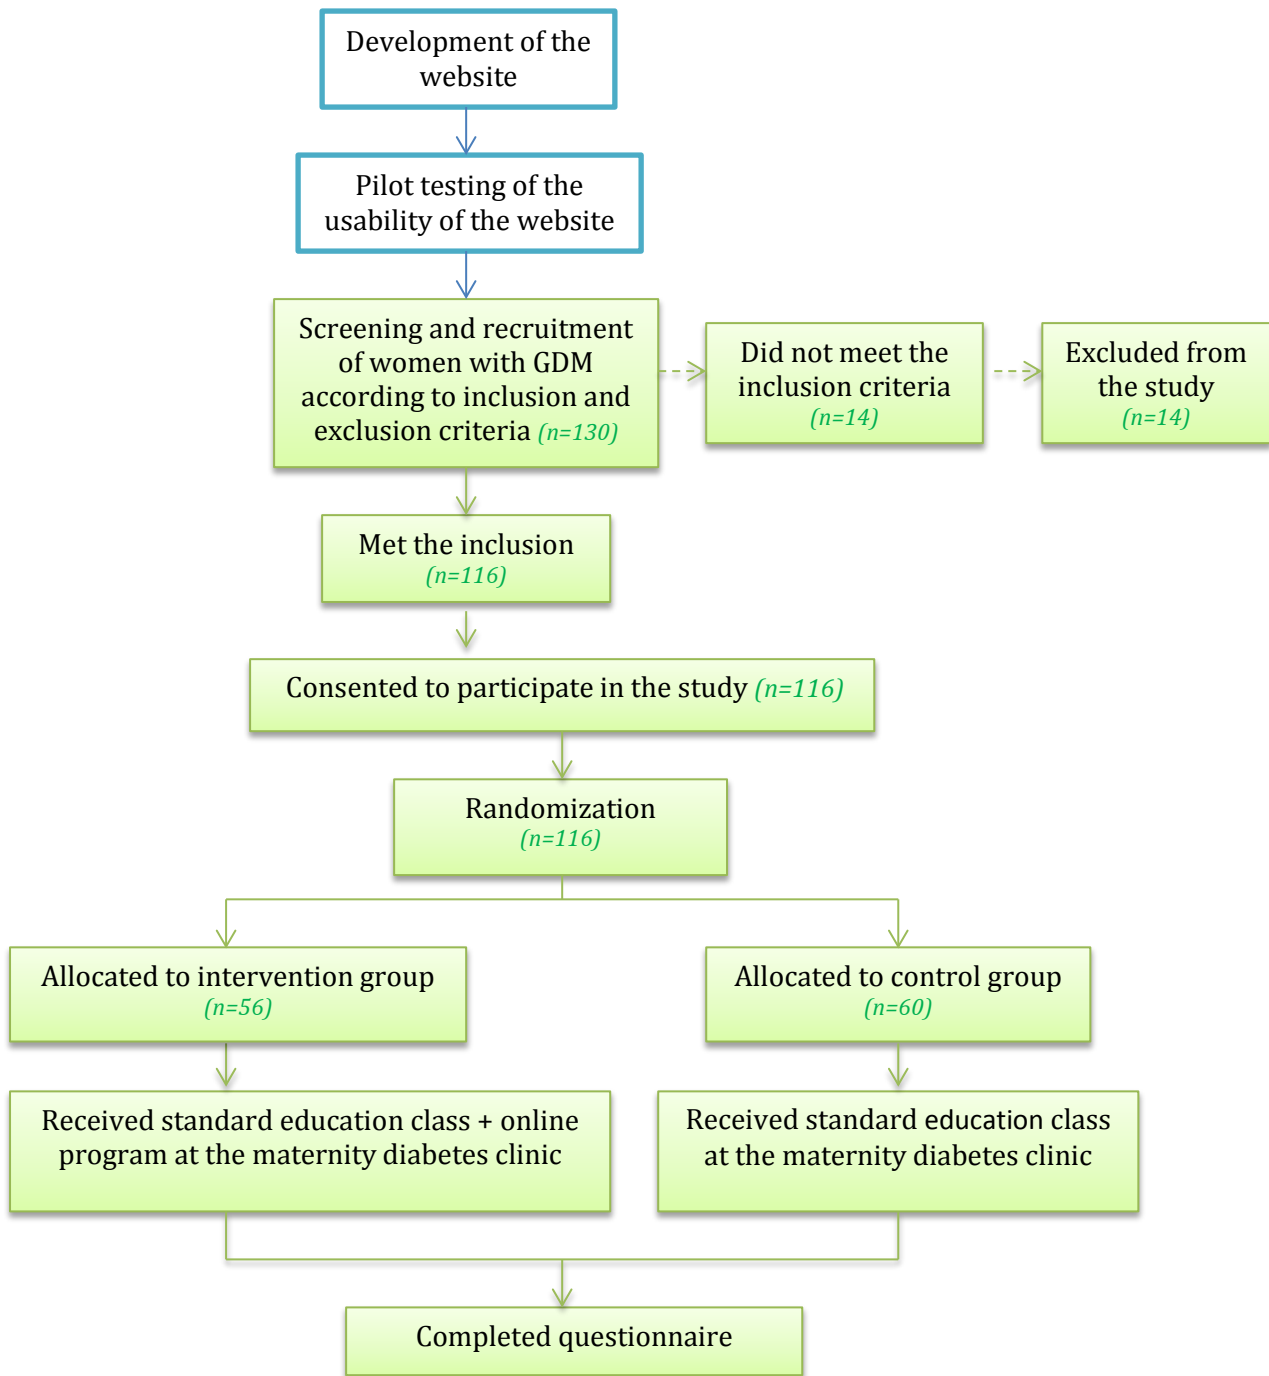

Supplement: 12884_2016_996_MOESM2_ESM.pdf [file 12884_2016_996_MOESM2_ESM.pdf]
